# Supplementary material for: Syntheses, structures, and magnetic properties of three new cyano-bridged heterobimetallic chains based on [Fe(Tp*)(CN)3]−
Source: Royal Society of Chemistry journal article supplement (doi:10.1039/c6nj01015f), 2016-01-01
Supplement: c6nj01015f1.pdf [file c6nj01015f1.pdf]

## Syntheses, structures, and magnetic properties of three new cyano-bridged heterobimetallic chains based on $[\text{Fe}(\text{Tp}^*)(\text{CN})_3]^-$

Dapeng Dong,<sup>a</sup> Yanjuan Zhang,<sup>b</sup> Chengqi Jiao,<sup>b</sup> Liang Zhao,<sup>b</sup> Tao Liu\*<sup>b</sup> Dedi Liu,<sup>a</sup> Zhenghua Li,<sup>a</sup> Jia Liu<sup>a</sup> and Dongping Liu\*<sup>a</sup>

### Supporting Information

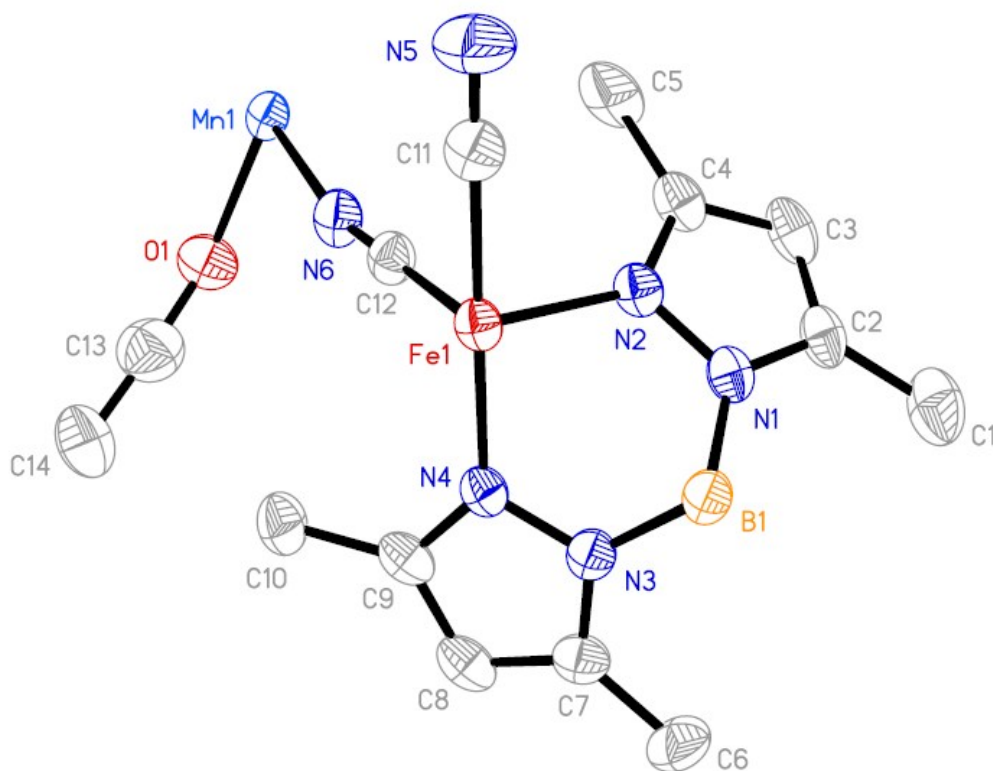

**Fig S1.** Asymmetric unit of compound **1** showing the atom labeling. Thermal ellipsoids are shown at the 30% probability level. All H atoms and water molecules are omitted for clarity.

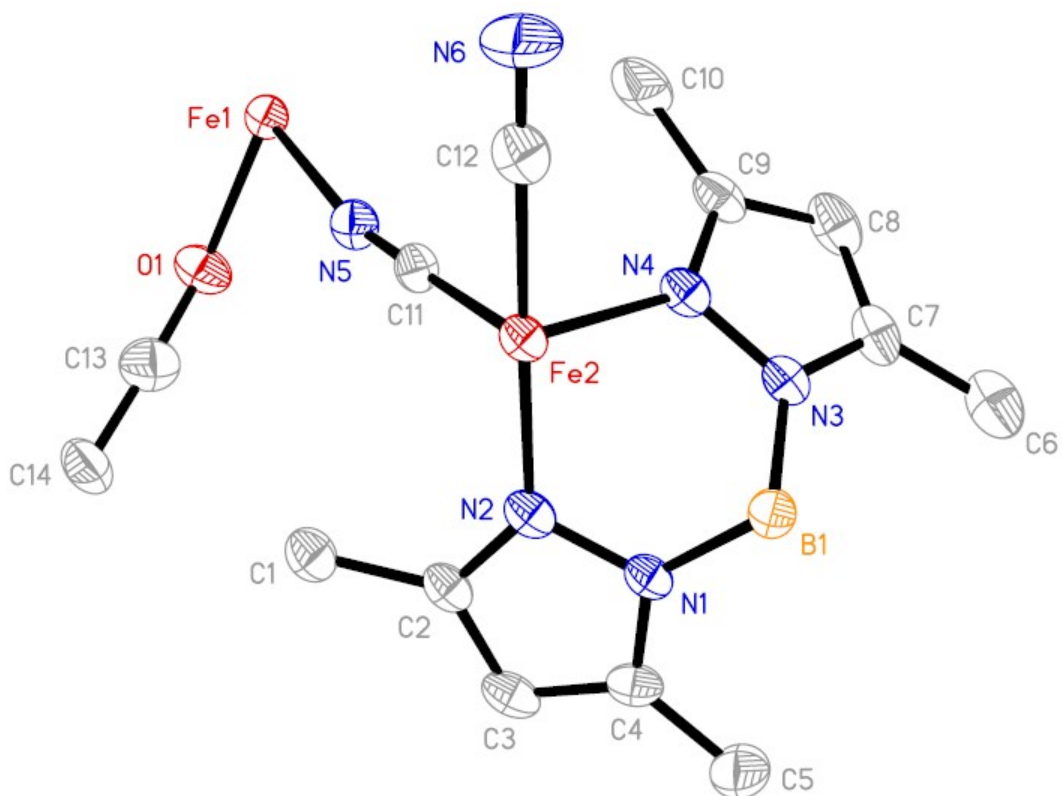

**Fig S2.** Asymmetric unit of compound **2** showing the atom labeling. Thermal ellipsoids are shown at the 30% probability level. All H atoms and water molecules are omitted for clarity.

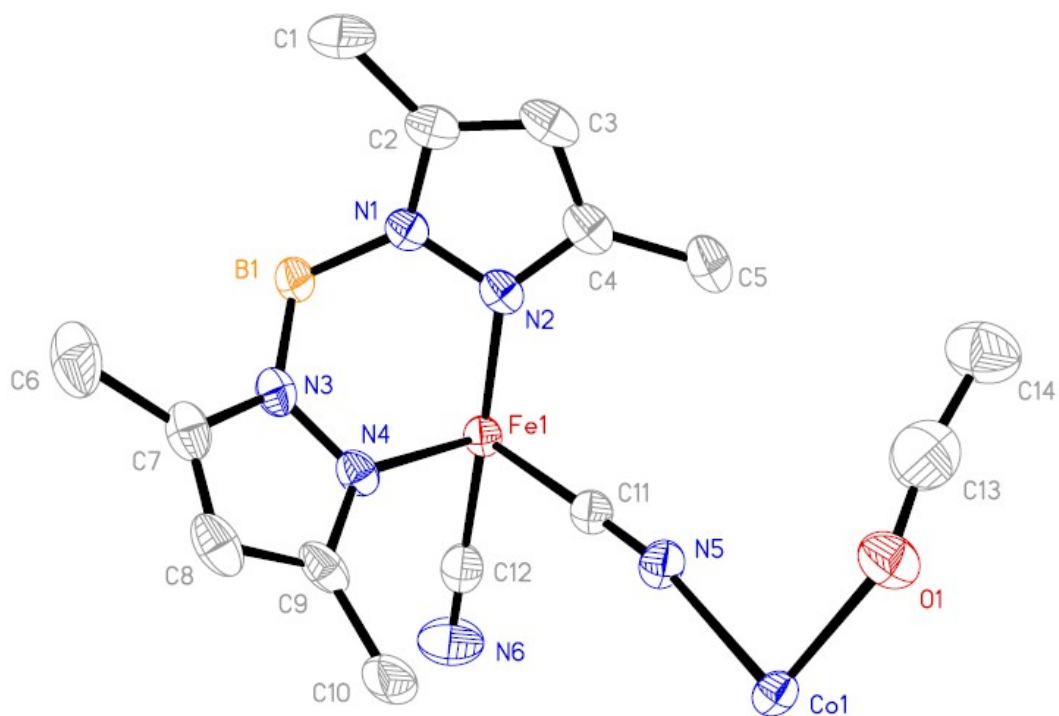

**Fig S3.** Asymmetric unit of compound **3** showing the atom labeling. Thermal ellipsoids are shown at the 30% probability level. All H atoms and water molecules are omitted for clarity.

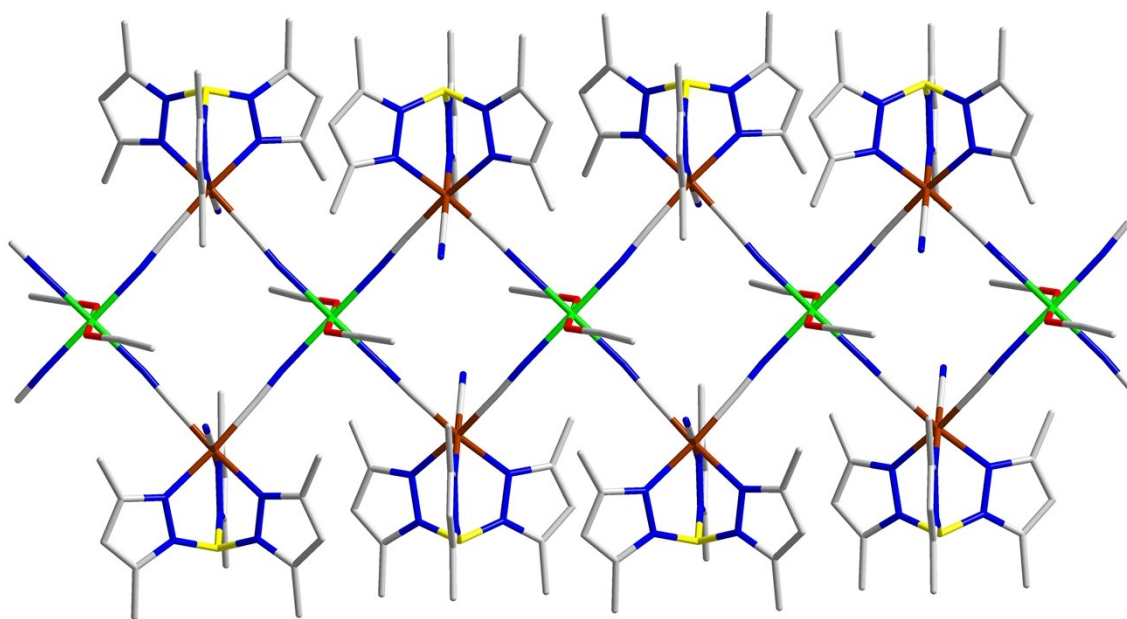

**Fig. S4.** Side view of a 1-D double-zigzag chain along the c-axis for compound **2**. H atoms and water molecules have been omitted for clarity. Atomic scheme: Fe(II), bright green; Fe(III), brown; C, gray; N, blue; B, yellow; O, red.

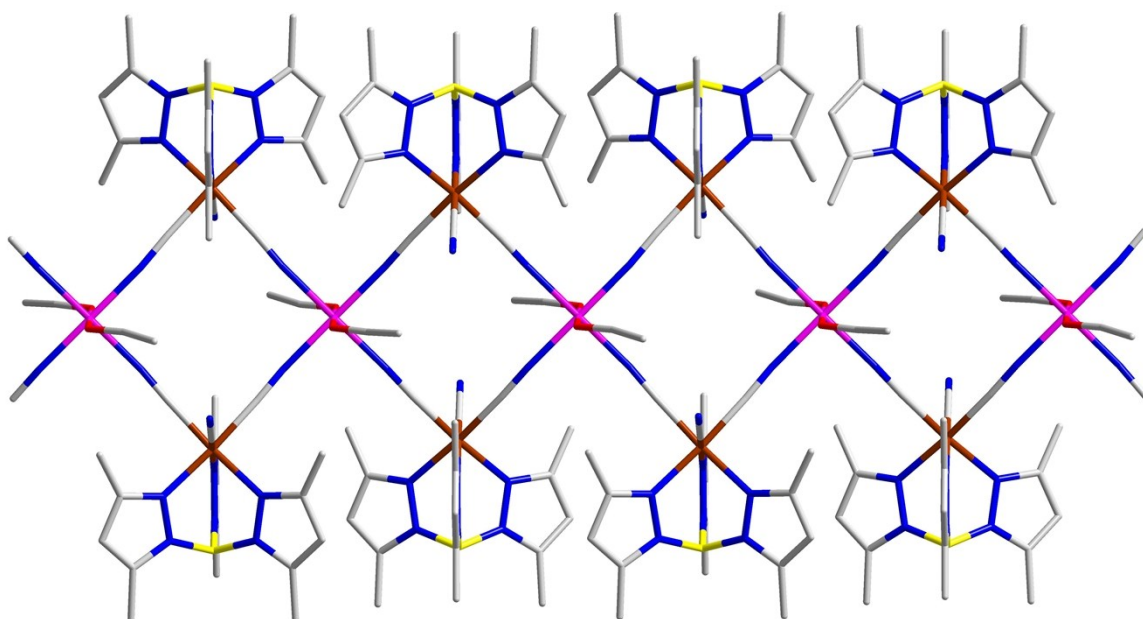

**Fig. S5.** Side view of a 1-D double-zigzag chain along the *c*-axis for compound **3**. H atoms and water molecules have been omitted for clarity. Atomic scheme: Co(II), pink; Fe(III), brown; C, gray; N, blue; B, yellow; O, red.

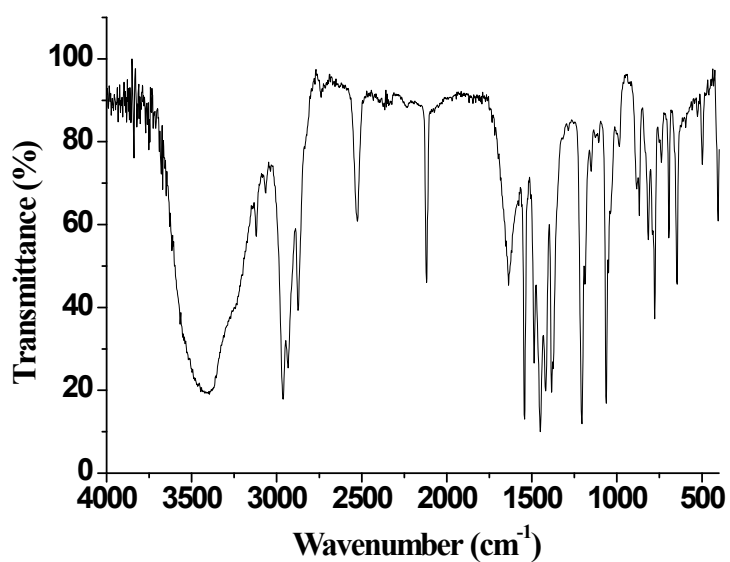

**Fig S6.** The IR spectrum of compound  $[\text{Bu}_4\text{N}][\text{Fe}(\text{Tp}^*)(\text{CN})_3]$ .

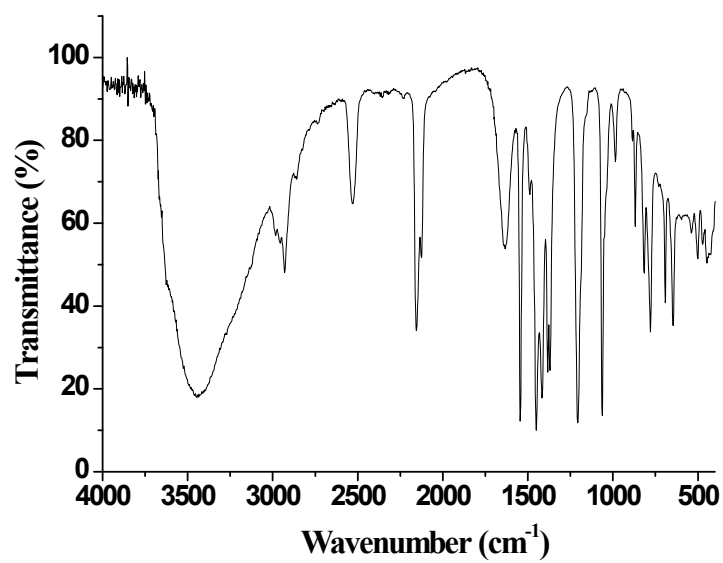

Fig S7. The IR spectra of compounds 1.

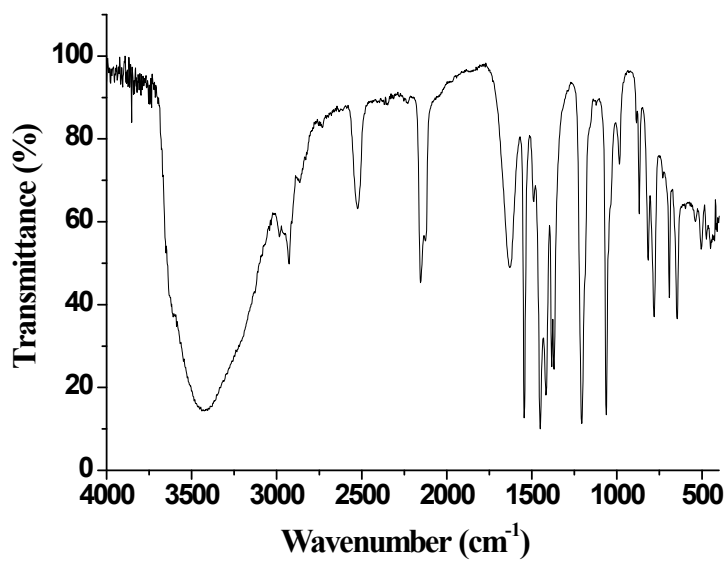

Fig S8. The IR spectra of compounds 2.

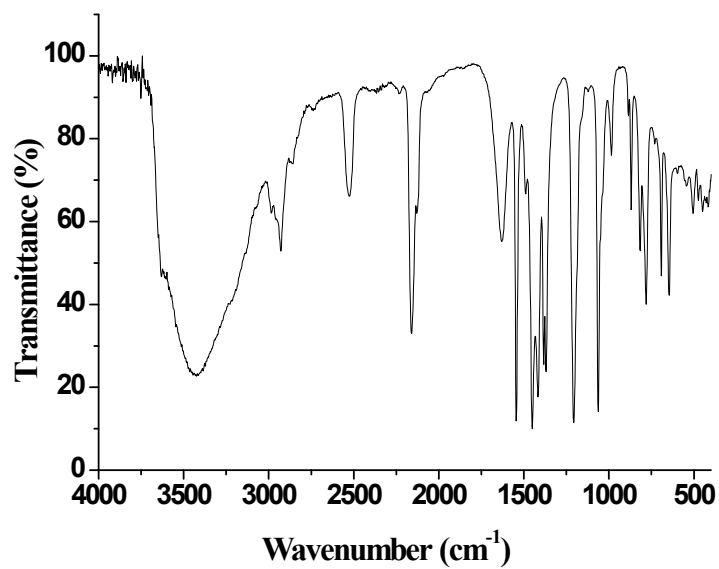

Fig S9. The IR spectra of compounds 3.

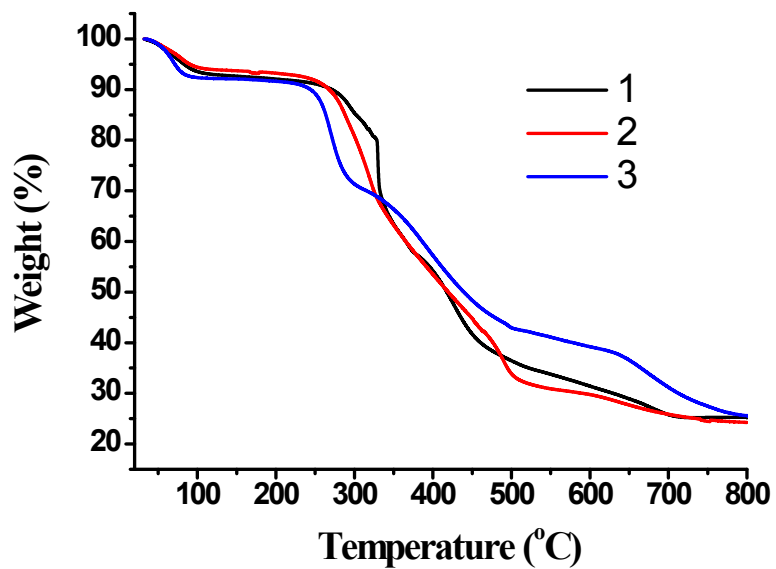

Fig S10. The TG curve of compound 1-3.

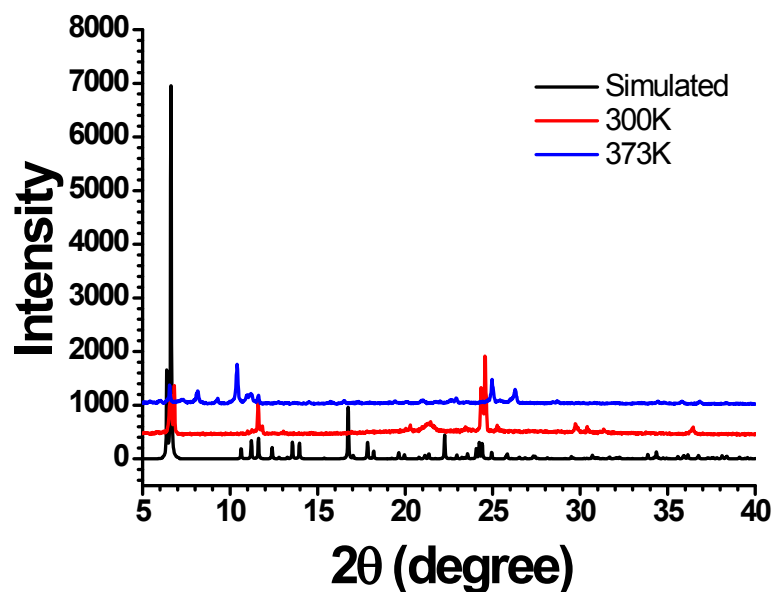

**Fig S11.** The simulated XRD pattern of compound 1 (up) and experimental powder XRD patterns at 300K (middle), 373K (down) of compounds 1.

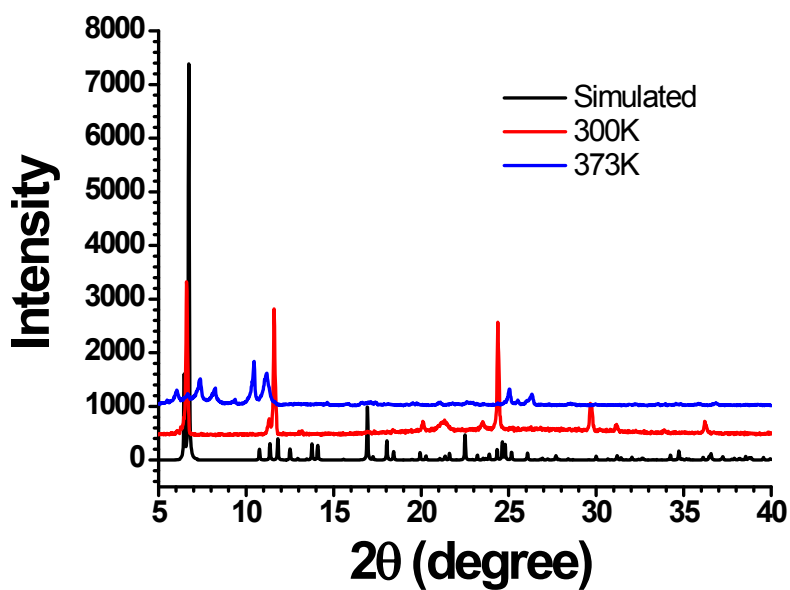

**Fig S12.** The simulated XRD pattern of compound 2 (up) and experimental powder XRD patterns at 300K (middle), 373K (down) of compounds 2.

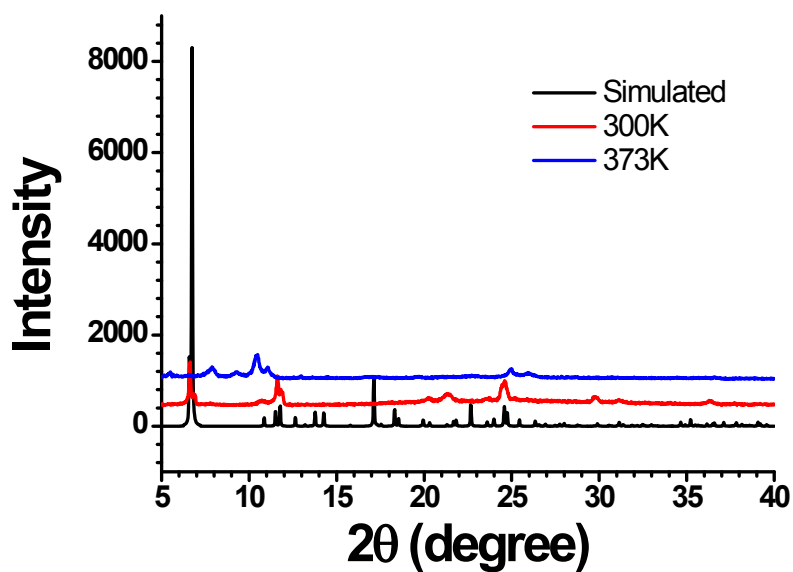

**Fig S13.** The simulated XRD pattern of compound **3** (up) and experimental powder XRD patterns at 300K (middle), 373K (down) of compounds **3**.

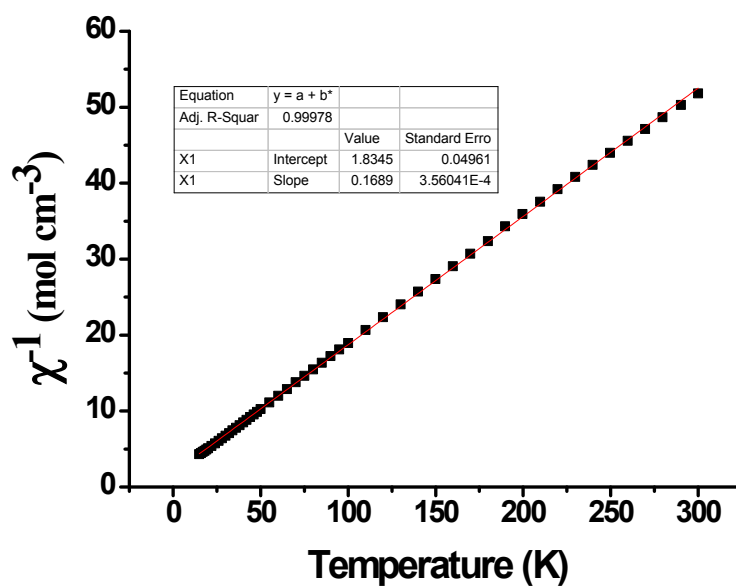

**Fig. S14** Thermal variation of magnetic susceptibility,  $\chi^{-1}$  vs T of compound **1** under an applied field of 1 kOe in the temperature range of 1.8–300 K.



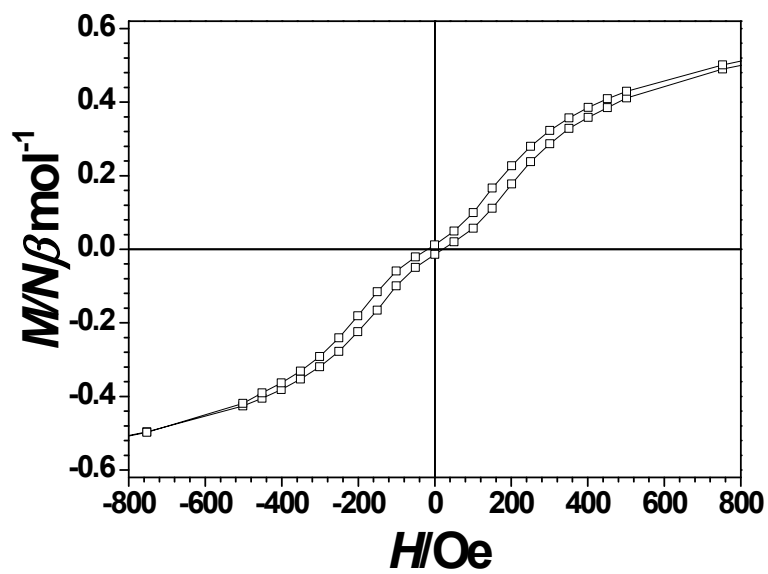

Fig S15. Field dependence of the magnetization showing the hysteresis loop for **1** at 1.8 K.

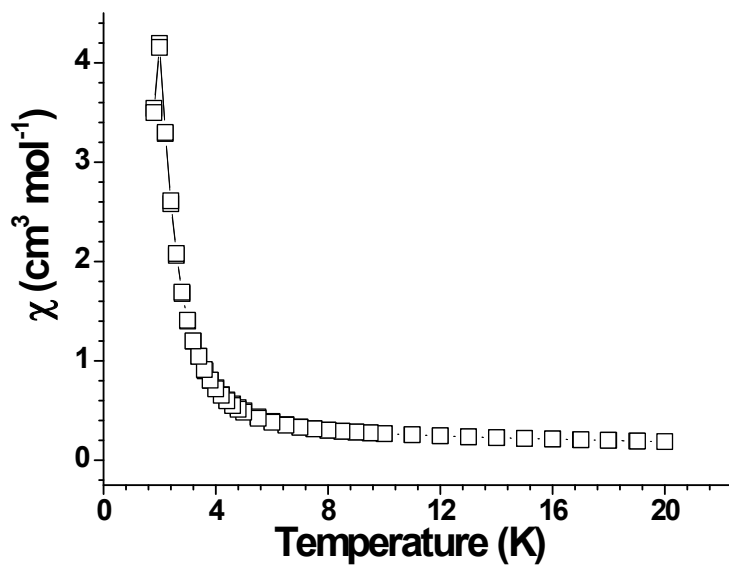

Fig. S16 The coincident ZFC and FC magnetization curves of **1** at 100 Oe.

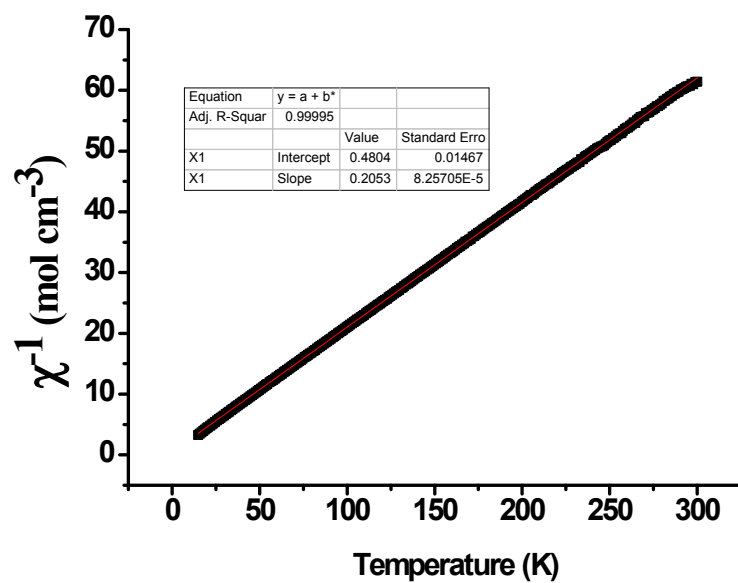

**Fig. S17** Thermal variation of magnetic susceptibility,  $\chi^{-1}$  vs T of compound **2** under an applied field of 1 kOe in the temperature range of 1.8–300 K.

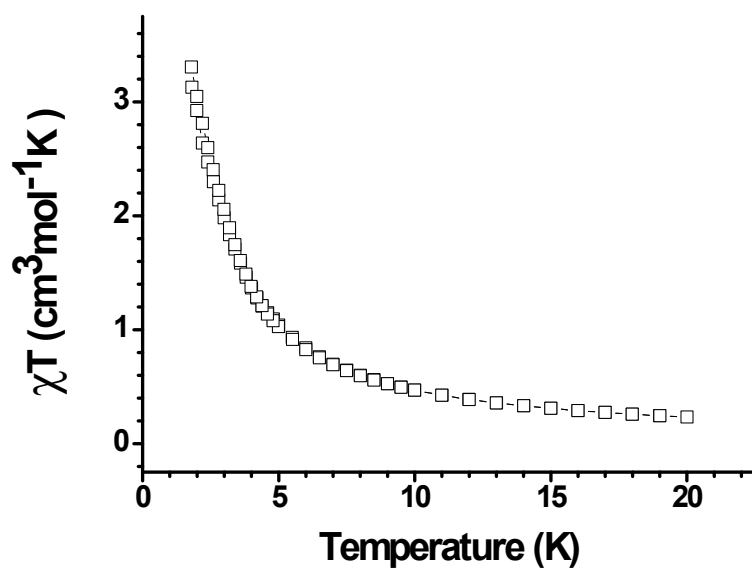

**Fig. S18** The coincident ZFC and FC magnetization curves of **2** at 100 Oe.

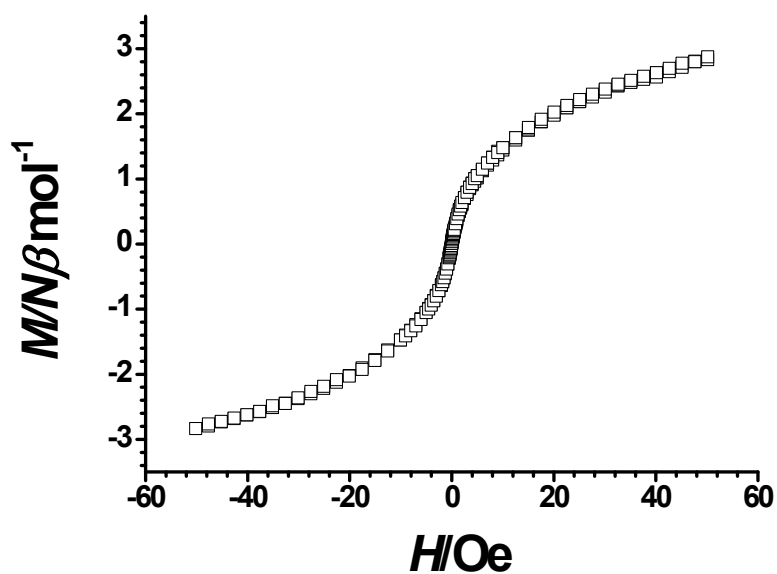

**Fig S19.** Field dependence of the magnetization showing the hysteresis loop for **2** at 1.8 K.

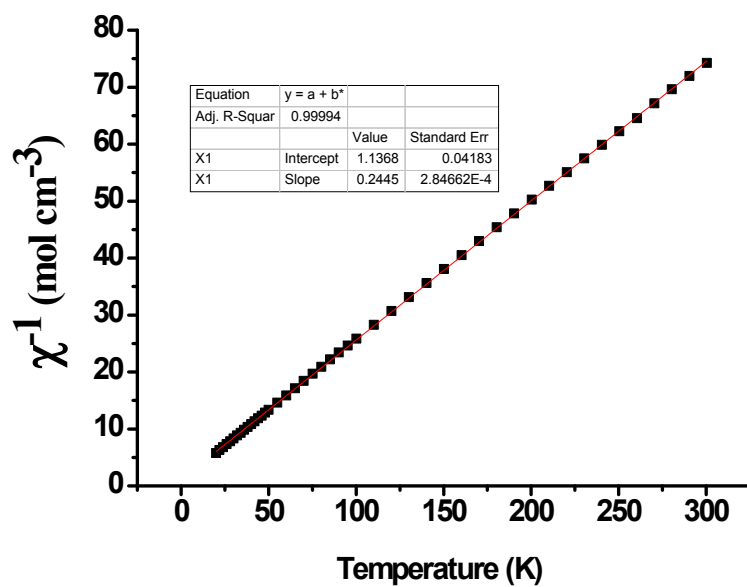

**Fig. S20** Thermal variation of magnetic susceptibility,  $\chi^{-1}$  vs T of compound **3** under an applied field of 1 kOe in the temperature range of 1.8–300 K.

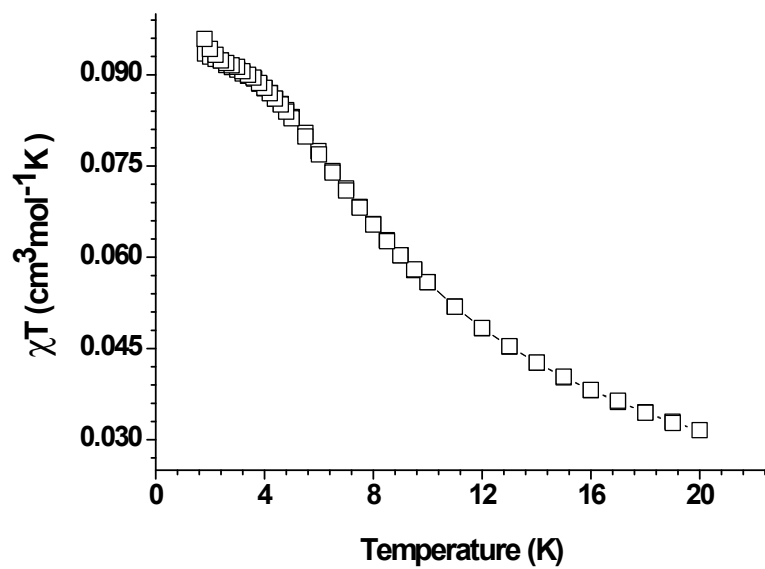

Fig. S21 The coincident ZFC and FC magnetization curves of **3** at 100 Oe.
